# Supplementary material for: New Meloxicam Derivatives—Synthesis and Interaction with Phospholipid Bilayers Measured by Differential Scanning Calorimetry and Fluorescence Spectroscopy
Source: MDPI journal article supplement (doi:10.3390/membranes13040416), 2023-04-06
Supplement: s1 [file s1]

**Content:**

1.  $^1\text{H}$  NMR spectra of new compounds (pages S2-S6)

2. Computational studies:

Table S1. Absorption and distribution of studied compounds and meloxicam (MLX); page S7

Table S2. Metabolism and excretion of studied compounds and meloxicam (MLX); page S7

Table S3. Toxicity of studied compounds and meloxicam (MLX); page S8

 **$^1\text{H}$  NMR spectra of new compounds**

| compound | structure                                                                           | page |
|----------|-------------------------------------------------------------------------------------|------|
| PR23     | 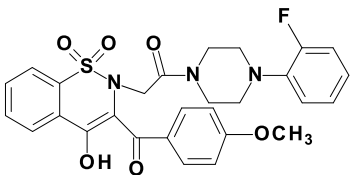   | S2   |
| PR24     |   | S3   |
| PR25     |  | S4   |
| PR49     |  | S5   |
| PR50     |  | S6   |

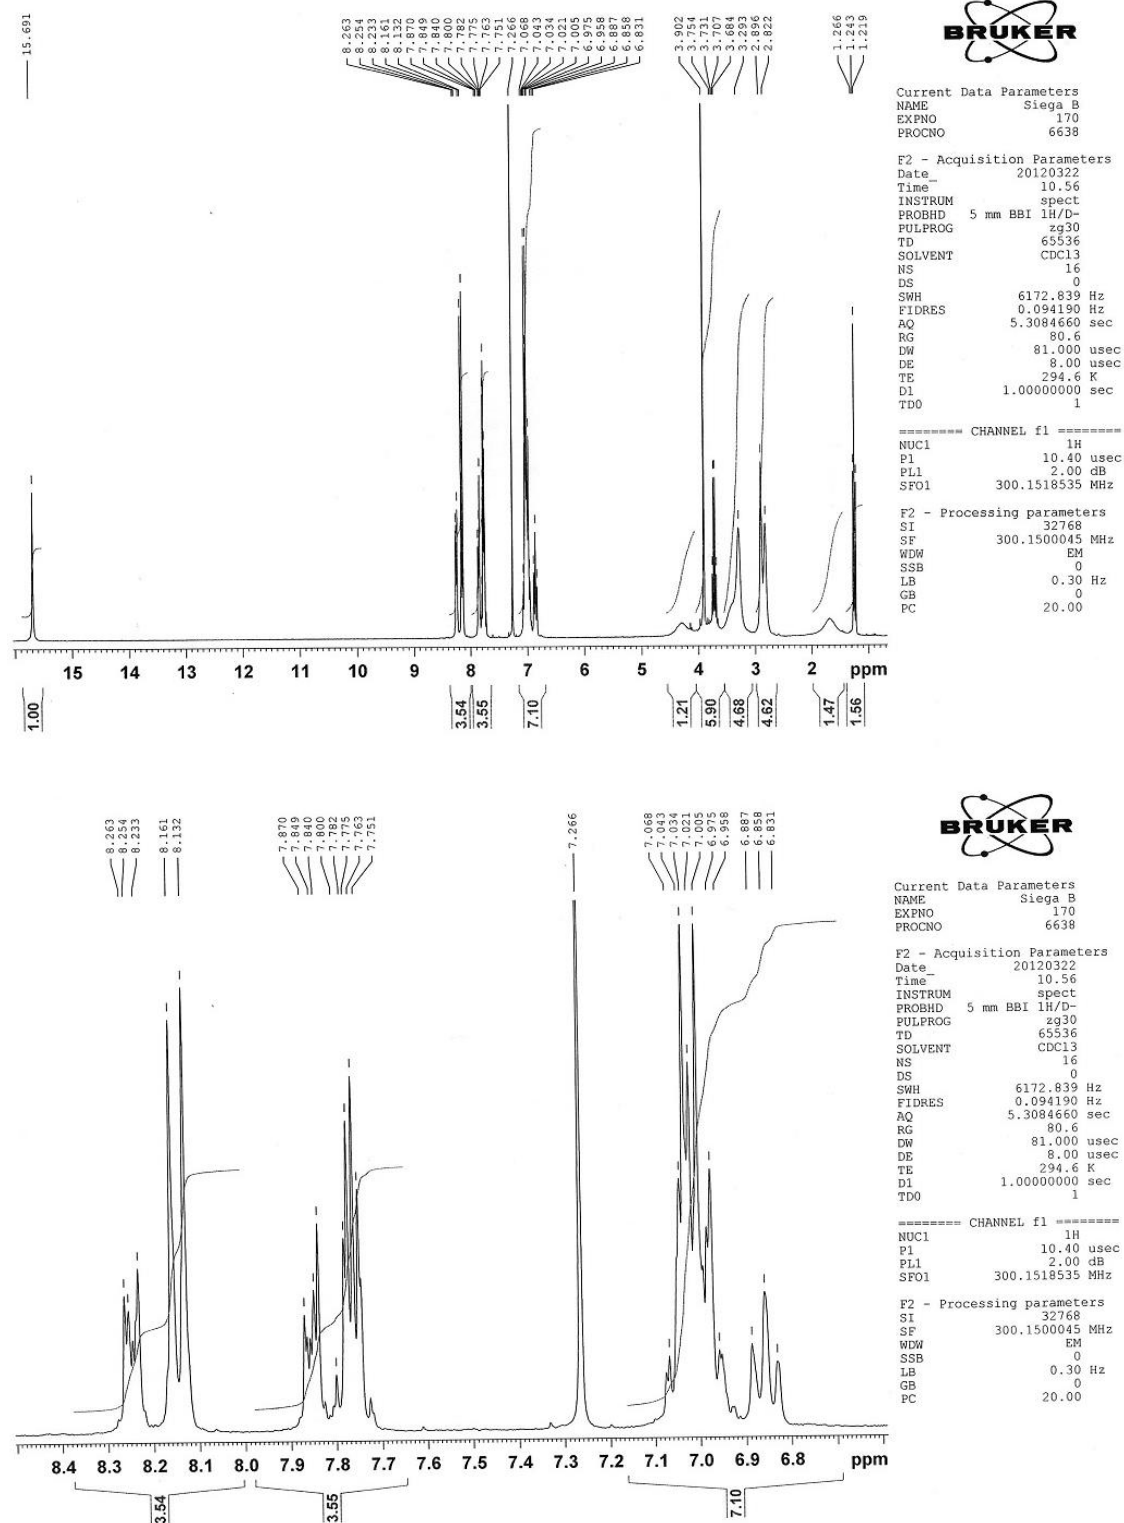

Figure S1.  $^1\text{H}$  NMR spectra of PR23 (full range at the top, aromatic range at the bottom).

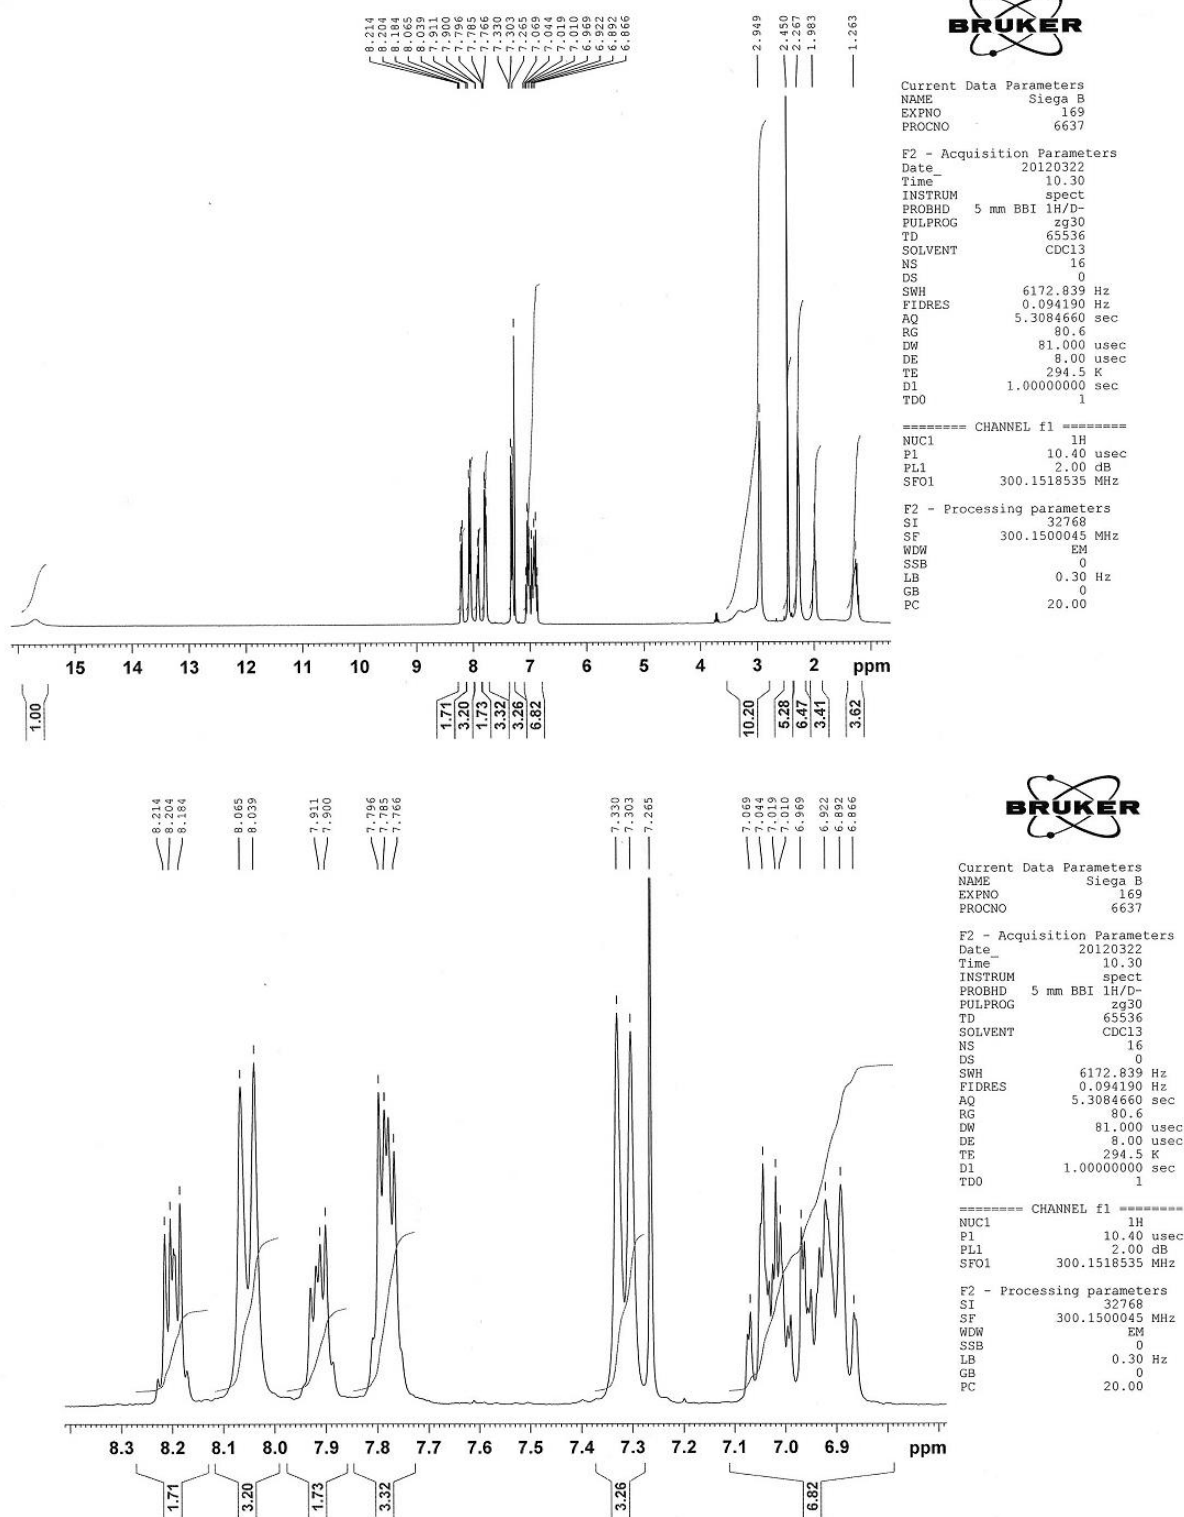

Figure S2.  $^1\text{H}$  NMR spectra of PR24 (full range at the top, aromatic range at the bottom).

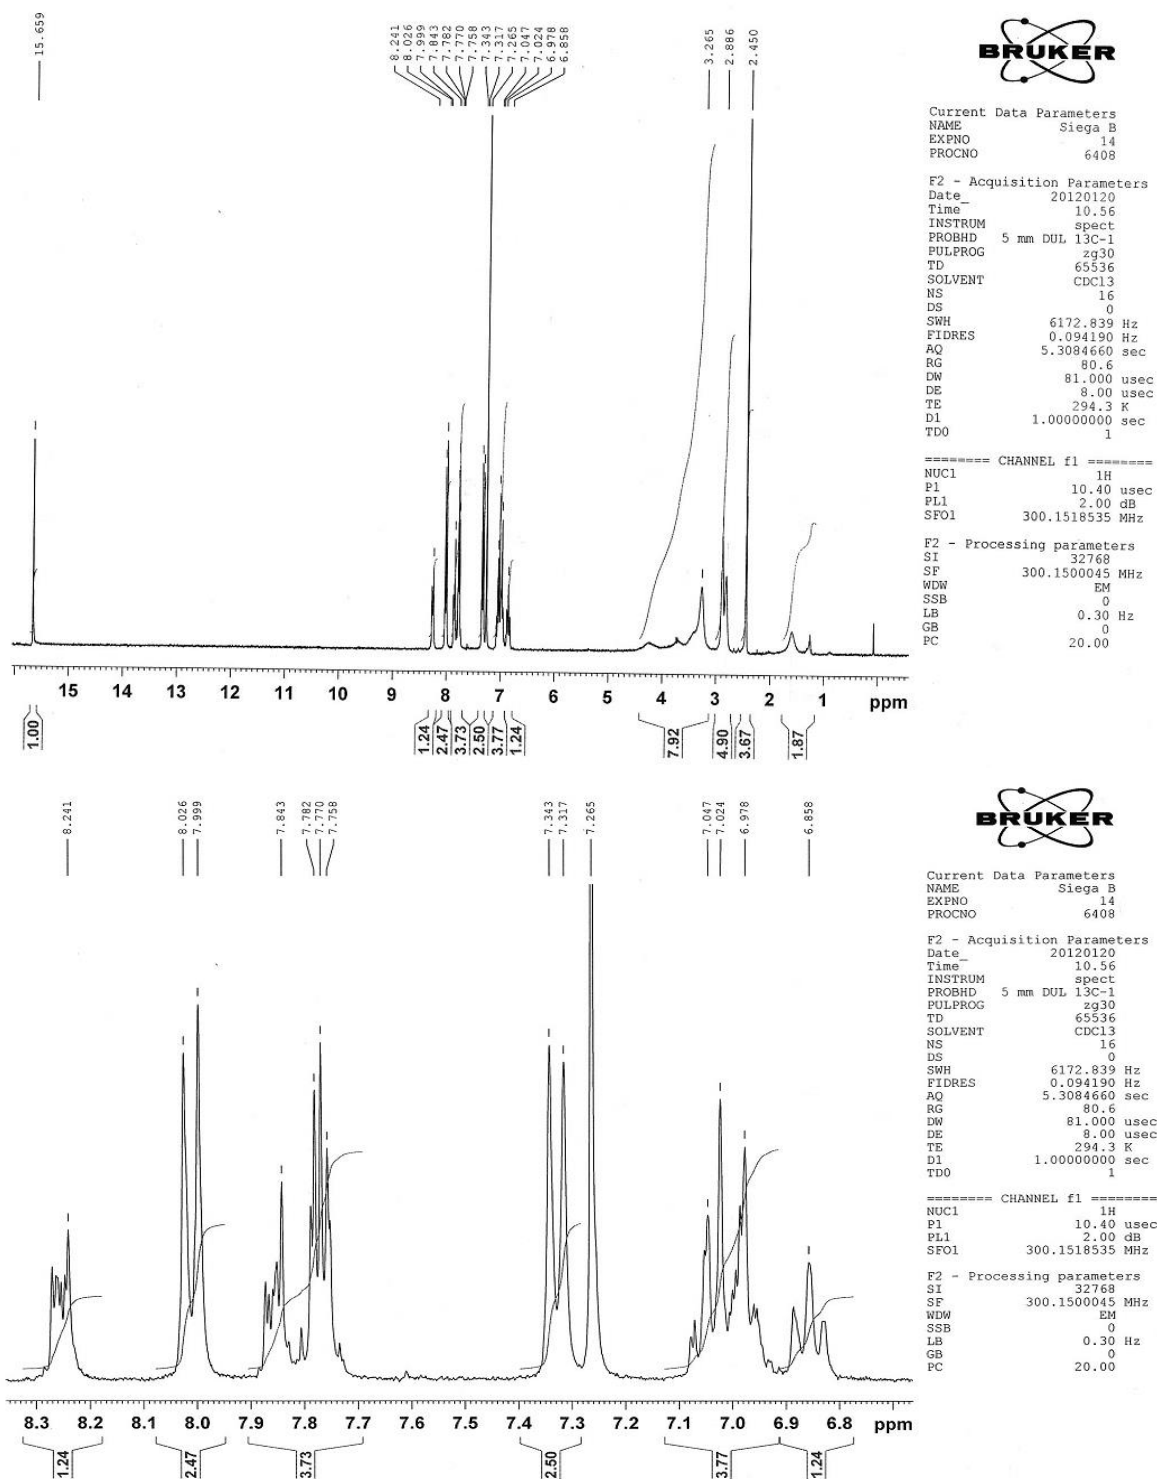

Figure S3.  $^1\text{H}$  NMR spectra of PR25 (full range at the top, aromatic range at the bottom).

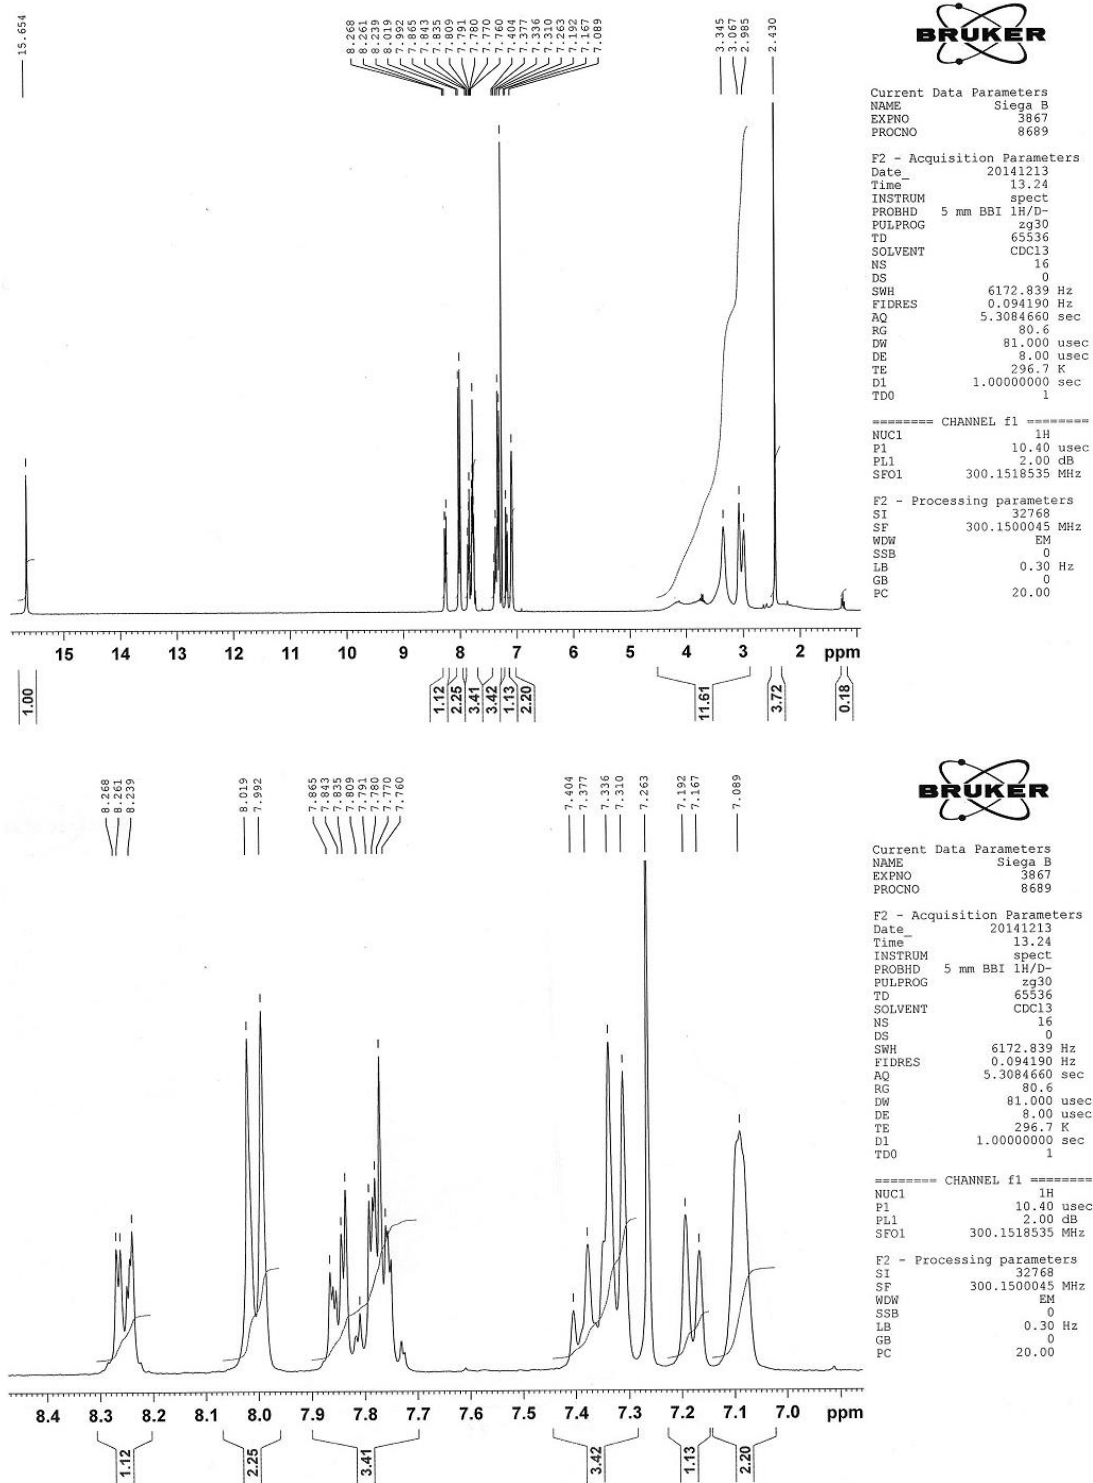

Figure S4.  $^1\text{H}$  NMR spectra of PR49 (full range at the top, aromatic range at the bottom).

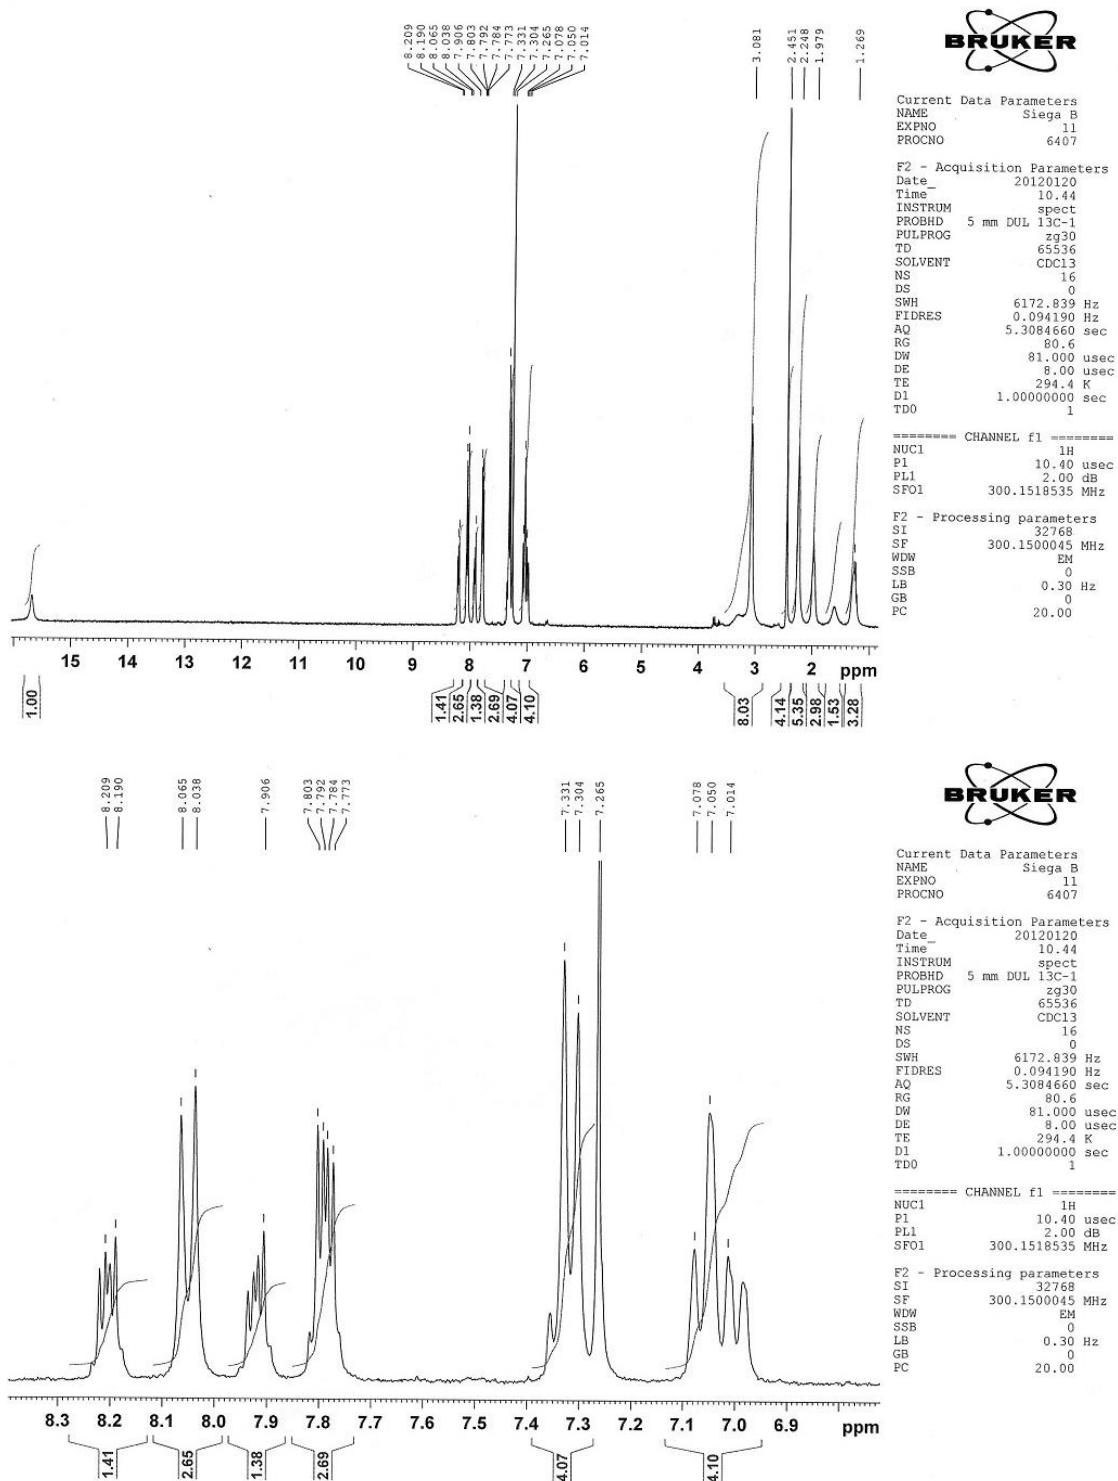

Figure S5.  $^1\text{H}$  NMR spectra of PR50 (full range at the top, aromatic range at the bottom).

**Table S1.** Absorption and distribution of studied compounds and meloxicam (MLX).

| Parameter                                                                                                                                                 | Compound             |                      |                      |                      |                      |                      |
|-----------------------------------------------------------------------------------------------------------------------------------------------------------|----------------------|----------------------|----------------------|----------------------|----------------------|----------------------|
|                                                                                                                                                           | PR23                 | PR24                 | PR25                 | PR49                 | PR50                 | MLX                  |
| <b>HIA</b> (Human Intestinal Absorption); Category 1: HIA+(HIA < 30%); Category 0: HIA-(HIA < 30%);<br>The output value is the probability of being HIA+) | 0.01                 | 0.004                | 0.005                | 0.009                | 0.005                | 0.004                |
| <b>Caco-2 Permeability</b> ; optimal higher than -5.15 log cm/s                                                                                           | -5.5                 | -5.6                 | -5.6                 | -5.584               | -5.7                 | -4.71                |
| <b>MDCK Permeability</b> ; high passive permeability: >20·10 <sup>-6</sup>                                                                                | 3.2·10 <sup>-5</sup> | 2.9·10 <sup>-5</sup> | 2.7·10 <sup>-5</sup> | 2.3·10 <sup>-5</sup> | 1.9·10 <sup>-5</sup> | 1.8·10 <sup>-5</sup> |
| <b>Pgp-inhibitor</b>                                                                                                                                      | +                    | +                    | +                    | +                    | +                    | -                    |
| <b>Pgp-substrate</b>                                                                                                                                      | -                    | -                    | -                    | -                    | -                    | -                    |
| <b>PPB</b> (Plasma Protein Binding; optimal < 90%. Drugs with high protein-bound may have a low therapeutic index)                                        | 98%                  | 98%                  | 99%                  | 99%                  | 98%                  | 99%                  |
| <b>VD</b> (Volume Distribution; optimal 0.04–20 L/kg)                                                                                                     | 0.4                  | 1.7                  | 0.4                  | 0.5                  | 2.0                  | 0.4                  |
| <b>BBB Penetration</b> (Blood-Brain Barrier Penetration<br>Category; 1: BBB+; Category 0: BBB-;<br>The output value is the probability of being BBB+)     | 0.1                  | 0.4                  | 0.1                  | 0.1                  | 0.5                  | 0.1                  |

**Table S2.** Metabolism and excretion of studied compounds and meloxicam (MLX).

| Parameter                                                                                     | Compound |      |      |      |      |       |
|-----------------------------------------------------------------------------------------------|----------|------|------|------|------|-------|
|                                                                                               | PR23     | PR24 | PR25 | PR49 | PR50 | MLX   |
| <b>CYP1A2</b> inhibitor                                                                       | no       | no   | no   | no   | no   | no    |
| <b>CYP2C19</b> inhibitor                                                                      | yes      | yes  | yes  | yes  | yes  | no    |
| <b>CYP2C9</b> inhibitor                                                                       | yes      | yes  | yes  | yes  | yes  | yes   |
| <b>CYP2D6</b> inhibitor                                                                       | no       | yes  | no   | no   | yes  | no    |
| <b>CYP3A4</b> inhibitor                                                                       | yes      | yes  | yes  | yes  | yes  | no    |
| <b>CL—Clearance</b> (high: > 15 mL/min/kg;<br>moderate: 5–15 mL/min/kg; low < 5 mL/min/kg)    | 5.3      | 5.1  | 3.8  | 2.9  | 4.2  | 3.867 |
| <b>T<sub>1/2</sub></b> (category 1: long half-life > 3h;<br>category 0: short half-life < 3h) | 0.08     | 0.01 | 0.06 | 0.05 | 0.01 | 0.427 |

**Table S3.** Toxicity of studied compounds and meloxicam (MLX).

| Parameter                                                                                       | Compound |       |       |       |       |       |
|-------------------------------------------------------------------------------------------------|----------|-------|-------|-------|-------|-------|
|                                                                                                 | PR23     | PR24  | PR25  | PR49  | PR50  | MLX   |
| <b>hERG Blockers</b> (heart rhythm disturbances) 1: active; 0: inactive                         | 0.2      | 0.8   | 0.1   | 0.2   | 0.8   | 0.9   |
| <b>H-HT – Human Hepatotoxicity</b><br>1: positive(+); 0: negative(-)                            | 1.0      | 1.0   | 0.9   | 1.0   | 0.9   | 0.9   |
| <b>DILI – Drug Induced Liver Injury</b><br>1: drugs with a high risk;<br>0: drugs with no risk. | 1.0      | 1.0   | 1.0   | 1.0   | 1.0   | 1.0   |
| <b>AMES Toxicity</b><br>1: Ames positive(+); 0: Ames negative(-)                                | 0.06     | 0.3   | 0.05  | 0.2   | 0.3   | 0.03  |
| <b>Rat Oral Acute Toxicity</b><br>0: low toxicity; 1: high toxicity                             | 0.6      | 0.2   | 0.1   | 0.8   | 0.4   | 0.3   |
| <b>Skin Sensitization</b><br>1: sensitizer; 0: non-sensitizer                                   | 0.04     | 0.03  | 0.04  | 0.04  | 0.02  | 0.07  |
| <b>Carcinogen</b><br>1: carcinogens; 0: non-carcinogens                                         | 0.5      | 0.1   | 0.5   | 0.1   | 0.1   | 0.7   |
| <b>Eye Irritation</b><br>1: irritants; 0: non-irritants                                         | 0.006    | 0.006 | 0.006 | 0.003 | 0.006 | 0.011 |
| <b>Respiratory Toxicity</b><br>1: toxicants; 0: non-toxicants                                   | 0.07     | 0.13  | 0.1   | 0.3   | 0.4   | 0.7   |
